# Supplementary material for: Variability of depolarization of aerosol particles in Beijing mega city:implication in interaction between anthropogenic pollutants andmineral dust particles
Source: Copernicus journal article supplement (doi:10.5194/acp-2018-511), 2018-07-02
Supplement: Supplementary file 1 [file acp-2018-511-supplement.pdf]

## Supplementary

### Tables

**Table S1: Wind degree corresponding to wind speed.**

| Wind degree         | 0       | 1       | 2       | 3       | 4       | 5        | 6         | 7         | 8         | 9         | 10        | 11        | 12        |
|---------------------|---------|---------|---------|---------|---------|----------|-----------|-----------|-----------|-----------|-----------|-----------|-----------|
| Wind speed<br>(m/s) | 0.0-0.2 | 0.3-1.5 | 1.6-3.3 | 3.4-5.0 | 5.5-7.1 | 8.0-10.7 | 10.8-13.8 | 13.9-17.1 | 17.2-20.7 | 20.8-24.4 | 24.5-28.4 | 28.5-32.6 | 32.7-36.9 |

Figures

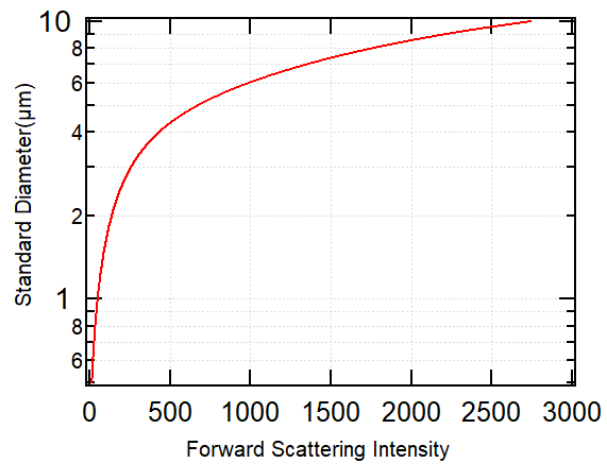

**Figure S1: Calibration curve between forward scattering intensity and standard spherical particles' diameter**
